# Supplementary material
Source: PubMed Central journal article supplement (PMC2268823)
Supplement: pnas_0710629105_3.pdf [file pnas_0710629105_3.pdf]

|                 |          |          |          |          |          |          |
|-----------------|----------|----------|----------|----------|----------|----------|
| <b>VP40</b>     | <b>+</b> | <b>+</b> | <b>+</b> | <b>+</b> | <b>+</b> | <b>+</b> |
| <b>Nedd4 Wt</b> | <b>+</b> | <b>+</b> | <b>+</b> | <b>-</b> | <b>-</b> | <b>-</b> |
| <b>Nedd4 CS</b> | <b>-</b> | <b>-</b> | <b>-</b> | <b>+</b> | <b>+</b> | <b>+</b> |
| <b>Ub</b>       | <b>+</b> | <b>+</b> | <b>+</b> | <b>+</b> | <b>+</b> | <b>+</b> |
| <b>ISG15</b>    | <b>-</b> | <b>+</b> | <b>+</b> | <b>-</b> | <b>+</b> | <b>+</b> |
| <b>UBE1L</b>    | <b>-</b> | <b>-</b> | <b>+</b> | <b>-</b> | <b>-</b> | <b>+</b> |
| <b>Ubch 8</b>   | <b>-</b> | <b>-</b> | <b>+</b> | <b>-</b> | <b>-</b> | <b>+</b> |

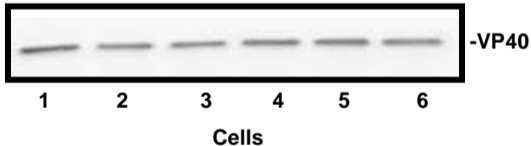

W 8.5 cm x H 6.0 cm
