# Supplementary material
Source: PubMed Central journal article supplement (PMC2268823)
Supplement: pnas_0710629105_4.pdf [file pnas_0710629105_4.pdf]

|                  | 4 hours PI                 | 6 hours PI                 |
|------------------|----------------------------|----------------------------|
| VSV-WT (- ISG15) | 3.0X10 <sup>3</sup> pfu/ml | 1.5X10 <sup>5</sup> pfu/ml |
| VSV-WT (+ ISG15) | 1.0X10 <sup>2</sup> pfu/ml | 1.3X10 <sup>4</sup> pfu/ml |
| PY>A4 (- ISG15)  | 1.6X10 <sup>2</sup> pfu/ml | 1.1X10 <sup>3</sup> pfu/ml |
| PY>A4 (+ ISG15)  | 2.3X10 <sup>2</sup> pfu/ml | 1.0X10 <sup>3</sup> pfu/ml |

Human 293T cells were transfected with pISG15 or vector alone for 24 hours. Cells were then infected with VSV-WT (Indiana serotype) or the PPxY mutant virus, PY>A4, at an MOI of 10.0 PFU/ml. Virus titers were measured at active budding times of 4 and 6 hours post-infection by standard plaque assay on BHK-21 cells performed in duplicate.
