# Supplementary material
Source: PubMed Central journal article supplement (PMC2268823)

|        |   |   |   |   |   |   |
|--------|---|---|---|---|---|---|
| VP40   | + | - | - | + | + | + |
| Tsg101 | - | + | - | + | + | + |
| ISG15  | - | - | + | - | + | + |
| UBE1L  | - | - | - | - | - | + |
| Ubch 8 | - | - | - | - | - | + |

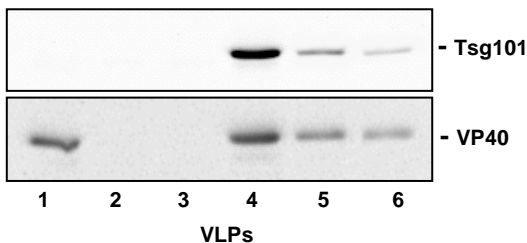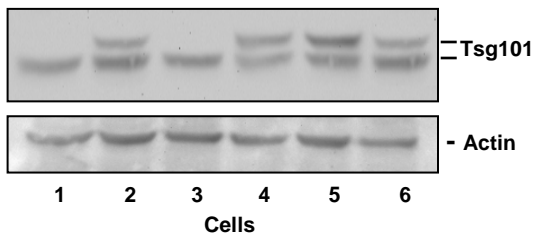

W 8.0cm X H 10.0 cm

Supplement: pnas_0710629105_1.pdf [file pnas_0710629105_1.pdf]

|                 |   |   |   |   |   |   |
|-----------------|---|---|---|---|---|---|
| <b>VP40</b>     | + | + | + | + | + | + |
| <b>Nedd4 WT</b> | + | + | + | - | - | - |
| <b>Nedd4 CS</b> | - | - | - | + | + | + |
| <b>Ub</b>       | + | + | + | + | + | + |
| <b>ISG15</b>    | - | + | + | - | + | + |
| <b>UBE1L</b>    | - | - | + | - | - | + |
| <b>Ubch 8</b>   | - | - | + | - | - | + |

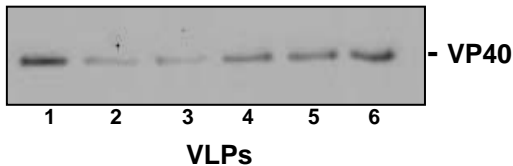

W 8.5 cm X H 6.5 cm

Supplement: pnas_0710629105_2.pdf [file pnas_0710629105_2.pdf]
